# Supplementary material for: Insights into Reactive Oxygen Species Production-Scavenging System Involved in Sugarcane Response to Xanthomonas albilineans Infection under Drought Stress
Source: MDPI journal article supplement (doi:10.3390/plants13060862), 2024-03-17
Supplement: s1 [file s1]

**Table S1.** Primer pairs used to analyze *ScRBOHD*, *ScSOD*, and *ScCAT* gene expressions by qRT-PCR assay.

| Target Gene    | Primer name | Sequence (5'→3')     | Amplification condition                                                                 |
|----------------|-------------|----------------------|-----------------------------------------------------------------------------------------|
| <i>ScRBOHD</i> | q-ScRBOHD-F | GACAAAGGAGCTGCGTGAAC | 95 °C, 30 s; 95 °C, 10 s, 60 °C, 30 s, 40 cycles; 95 °C, 15 s, 60 °C, 60 s, 95 °C, 15 s |
|                | q-ScRBOHD-R | CCTGCCGTCTACATCCATCC |                                                                                         |
| <i>ScSOD</i>   | q-ScSOD-F   | TCCCACTAACTGGGCCAAAC |                                                                                         |
|                | q-ScSOD-R   | TCGTGACCACCCTTTCCAAG |                                                                                         |
| <i>ScCAT</i>   | q-ScCAT--F  | TCCAGCTTCTGGACCACCAA |                                                                                         |
|                | q-ScCAT--R  | CGTTCCTGTCGAACTGAGC  |                                                                                         |
| <i>ScGAPDH</i> | GAPDH-F     | CACGGCCACTGGAAGCA    |                                                                                         |
|                | GAPDH-R     | TCCTCAGGGTTCCTGATGCC |                                                                                         |
